# Supplementary material
Source: HighWire-hosted journal article supplement (https://bmjopen.bmj.com/content/9/6/e026035)
Supplement: inline-supplementary-material-1 [file inline-supplementary-material-1.pdf]

**Supplementary Table S1. Prevalence of gastrointestinal conditions and use of restrictive diets and their association with health-related quality of life (physical and mental component scores) among individuals  $\geq 20$  years in South Australia in 2015 (N=2912), adjusted for mental health, lifestyle variables and body mass index.**

|                                             | Yes |      | Physical component score |                         | Mental component score  |                         |
|---------------------------------------------|-----|------|--------------------------|-------------------------|-------------------------|-------------------------|
|                                             |     |      | Adjusted <sup>1</sup>    | Adjusted <sup>2</sup>   | Adjusted <sup>1</sup>   | Adjusted <sup>2</sup>   |
|                                             | n   | %    | $\beta$ (95%CI)*         | $\beta$ (95%CI)*        | $\beta$ (95%CI)*        | $\beta$ (95%CI)*        |
| <b>Gastrointestinal condition</b>           |     |      |                          |                         |                         |                         |
| Gastroesophageal reflux                     | 245 | 8.4  | <b>-3.3 (-4.7;-1.8)</b>  | <b>-2.8 (-4.2;-1.3)</b> | -1.1 (-2.4;0.3)         | -1.0 (-2.4;0.4)         |
| Irritable bowel syndrome                    | 230 | 7.9  | <b>-3.0 (-4.5;-1.5)</b>  | <b>-2.7 (-4.2;-1.3)</b> | <b>-2.0 (-3.3;-0.7)</b> | <b>-1.8 (-3.1;-0.5)</b> |
| Ulcerative colitis                          | 26  | 0.9  | -2.6 (-6.9;1.8)          | -1.9 (-6.4;2.6)         | <b>-5.4 (-8.8;-2.0)</b> | <b>-4.8 (-8.1;-1.6)</b> |
| Crohn's disease                             | 23  | 0.8  | -4.1 (-9.5;1.2)          | -3.4 (-8.9;2.0)         | -1.7 (-5.1;1.7)         | -1.1 (-4.5;2.3)         |
| Coeliac disease                             | 20  | 0.7  | -1.5 (-4.8;1.7)          | -1.6 (-4.9;1.6)         | 0.0 (-2.4;2.5)          | -0.2 (-2.4;2.0)         |
| Any <sup>3</sup>                            | 478 | 16.4 | <b>-3.1 (-4.1;-2.1)</b>  | <b>-2.7 (-3.8;-1.6)</b> | <b>-1.5 (-2.4;-0.5)</b> | <b>-1.4 (-2.3;-0.4)</b> |
| <b>Restrictive diet</b>                     |     |      |                          |                         |                         |                         |
| Avoid foods for pain, bloating or diarrhoea | 678 | 23.3 | <b>-1.9 (-2.9;-1.0)</b>  | <b>-1.7 (-2.6;-0.9)</b> | <b>-1.0 (-1.9;-0.1)</b> | <b>-0.9 (-1.8;-0.1)</b> |

|                    |      |      |                         |                         |                         |                         |
|--------------------|------|------|-------------------------|-------------------------|-------------------------|-------------------------|
| Lactose restricted | 577  | 19.8 | <b>-1.4 (-2.2;-0.5)</b> | <b>-1.6 (-2.4;-0.8)</b> | -0.7 (-1.6;0.1)         | -0.8 (-1.6;0.1)         |
| Gluten restricted  | 268  | 9.2  | -0.8 (-2.0;0.3)         | -1.0 (-2.1;0.1)         | -0.8 (-2.0;0.1)         | -0.9 (-2.1;0.3)         |
| Any <sup>4</sup>   | 1051 | 36.1 | <b>-1.8 (-2.7;-1.0)</b> | <b>-1.8 (-2.5;-1.0)</b> | <b>-1.0 (-1.7;-0.3)</b> | <b>-1.0 (-1.7;-0.2)</b> |

\* The  $\beta$  coefficients represent the mean difference in health-related quality of life between those positive for that condition and the negative ones.

Numbers in bold represent the associations with statistical difference between the groups ( $p < 0.05$ ).

1 – Results are adjusted for sex, age, marital status, area of residence, educational level, working status, socioeconomic position, and mental health status

2 – Results are adjusted for 1 + fruit/vegetable consumption, physical activity level, alcohol intake, smoking status, and body mass index

3 – Either with irritable bowel syndrome, celiac disease, Crohn's disease, ulcerative colitis, and/or gastrointestinal reflux.

4 – Either those restricting milk/dairy products, gluten, and/or if they avoid other foods causing pain, bloating, and/or diarrhoea
